# Supplementary material for: Succession of arbuscular mycorrhizal fungi along a 52-years agricultural recultivation chronosequence
Source: Oxford University Press journal article supplement (doi:10.1093/femsec/fix102), 2017-08-11
Supplement: fix102_Supp.zip [file fix102_Supp.zip]

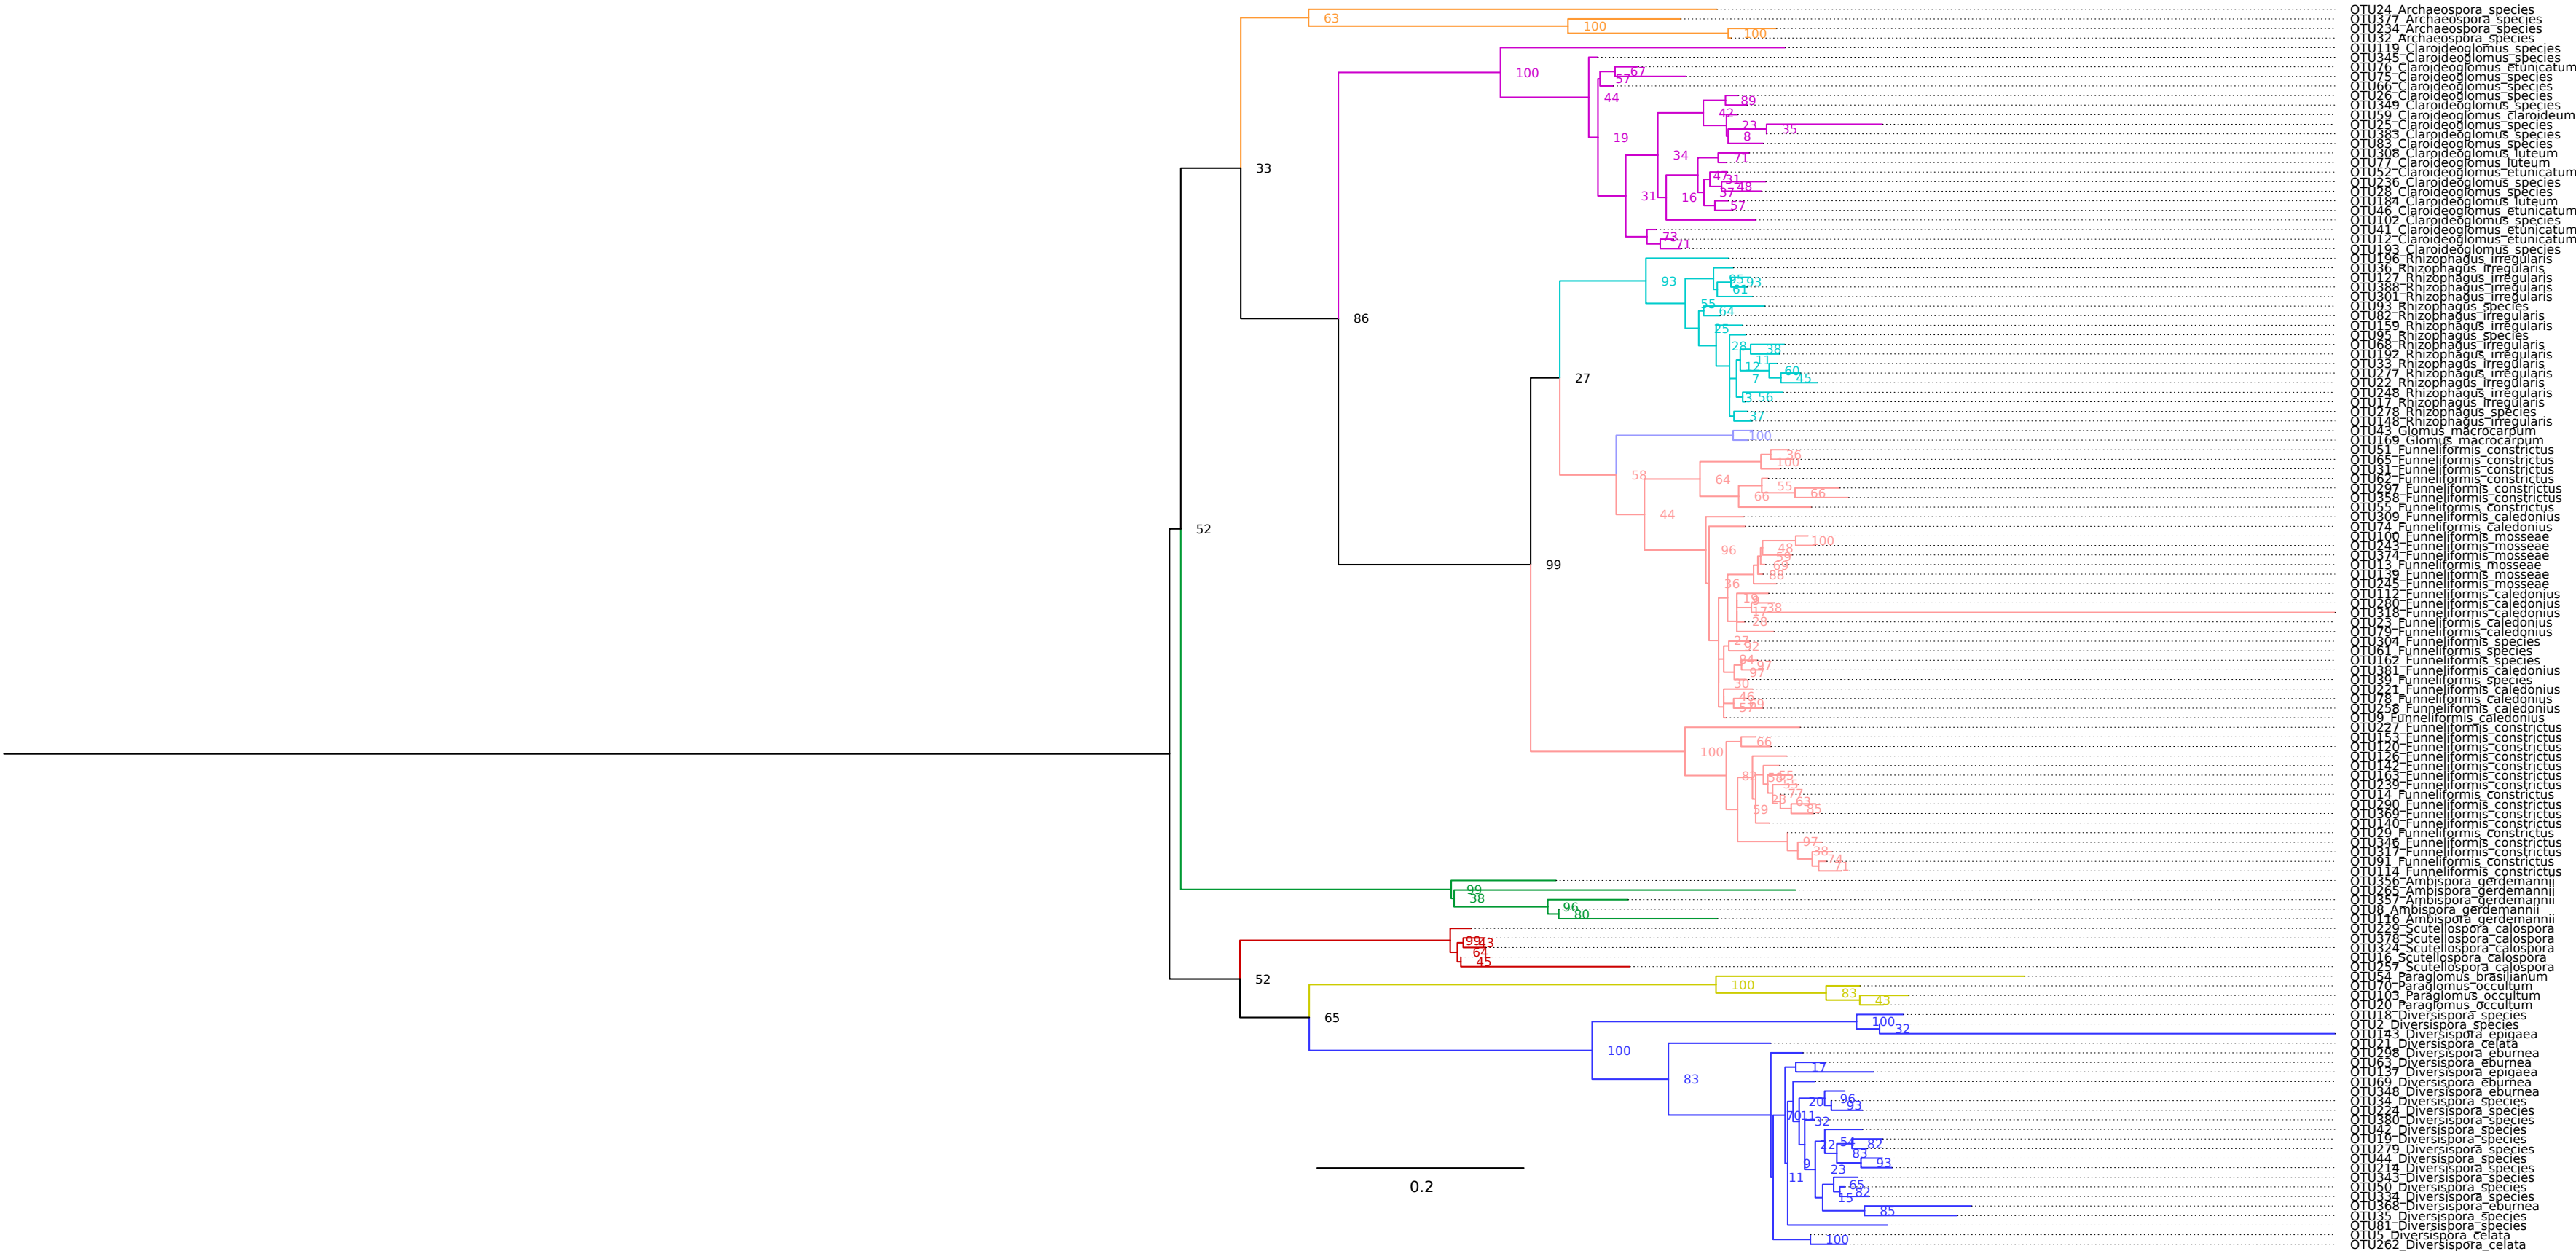

- OTU24 Archaeospora species
- OTU377 Archaeospora species
- OTU234 Archaeospora species
- OTU32 Archaeospora species
- OTU119 Claroideoglomus species
- OTU345 Claroideoglomus species
- OTU76 Claroideoglomus etunicatum
- OTU75 Claroideoglomus species
- OTU66 Claroideoglomus species
- OTU26 Claroideoglomus species
- OTU49 Claroideoglomus species
- OTU59 Claroideoglomus claroideum
- OTU25 Claroideoglomus species
- OTU383 Claroideoglomus species
- OTU83 Claroideoglomus species
- OTU306 Claroideoglomus luteum
- OTU52 Claroideoglomus etunicatum
- OTU236 Claroideoglomus species
- OTU28 Claroideoglomus species
- OTU46 Claroideoglomus luteum
- OTU44 Claroideoglomus etunicatum
- OTU102 Claroideoglomus species
- OTU12 Claroideoglomus etunicatum
- OTU196 Claroideoglomus species
- OTU186 Rhizophagus irregularis
- OTU36 Rhizophagus irregularis
- OTU127 Rhizophagus irregularis
- OTU388 Rhizophagus irregularis
- OTU91 Rhizophagus species
- OTU82 Rhizophagus irregularis
- OTU159 Rhizophagus irregularis
- OTU95 Rhizophagus species
- OTU68 Rhizophagus irregularis
- OTU192 Rhizophagus irregularis
- OTU33 Rhizophagus irregularis
- OTU277 Rhizophagus irregularis
- OTU22 Rhizophagus irregularis
- OTU248 Rhizophagus irregularis
- OTU27 Rhizophagus irregularis
- OTU278 Rhizophagus species
- OTU148 Rhizophagus irregularis
- OTU43 Glomus macrocarpum
- OTU169 Glomus macrocarpum
- OTU5 Funneliformis constrictus
- OTU65 Funneliformis constrictus
- OTU31 Funneliformis constrictus
- OTU62 Funneliformis constrictus
- OTU29 Funneliformis constrictus
- OTU55 Funneliformis constrictus
- OTU309 Funneliformis caledonius
- OTU74 Funneliformis caledonius
- OTU100 Funneliformis mosseae
- OTU265 Funneliformis mosseae
- OTU374 Funneliformis mosseae
- OTU13 Funneliformis mosseae
- OTU139 Funneliformis mosseae
- OTU245 Funneliformis mosseae
- OTU117 Funneliformis caledonius
- OTU180 Funneliformis caledonius
- OTU318 Funneliformis caledonius
- OTU23 Funneliformis caledonius
- OTU79 Funneliformis caledonius
- OTU61 Funneliformis species
- OTU162 Funneliformis species
- OTU381 Funneliformis caledonius
- OTU39 Funneliformis species
- OTU271 Funneliformis caledonius
- OTU78 Funneliformis caledonius
- OTU258 Funneliformis caledonius
- OTU9 Funneliformis caledonius
- OTU227 Funneliformis constrictus
- OTU153 Funneliformis constrictus
- OTU126 Funneliformis constrictus
- OTU142 Funneliformis constrictus
- OTU163 Funneliformis constrictus
- OTU239 Funneliformis constrictus
- OTU14 Funneliformis constrictus
- OTU290 Funneliformis constrictus
- OTU369 Funneliformis constrictus
- OTU140 Funneliformis constrictus
- OTU49 Funneliformis constrictus
- OTU246 Funneliformis constrictus
- OTU317 Funneliformis constrictus
- OTU91 Funneliformis constrictus
- OTU114 Funneliformis constrictus
- OTU356 Ambispora gerdemannii
- OTU357 Ambispora gerdemannii
- OTU8 Ambispora gerdemannii
- OTU116 Ambispora gerdemannii
- OTU228 Scutellospora calospora
- OTU324 Scutellospora calospora
- OTU16 Scutellospora calospora
- OTU257 Scutellospora calospora
- OTU54 Paraglomus occultum
- OTU103 Paraglomus occultum
- OTU20 Paraglomus occultum
- OTU18 Diversispora species
- OTU2 Diversispora species
- OTU143 Diversispora epigaea
- OTU21 Diversispora celata
- OTU298 Diversispora eburnea
- OTU63 Diversispora eburnea
- OTU137 Diversispora epigaea
- OTU69 Diversispora eburnea
- OTU348 Diversispora eburnea
- OTU34 Diversispora species
- OTU224 Diversispora species
- OTU380 Diversispora species
- OTU42 Diversispora species
- OTU19 Diversispora species
- OTU279 Diversispora species
- OTU44 Diversispora species
- OTU214 Diversispora species
- OTU243 Diversispora species
- OTU50 Diversispora species
- OTU334 Diversispora species
- OTU368 Diversispora eburnea
- OTU35 Diversispora species
- OTU81 Diversispora species
- OTU8 Diversispora celata
- OTU262 Diversispora celata
