# Supplementary material for: Succession of arbuscular mycorrhizal fungi along a 52-years agricultural recultivation chronosequence
Source: Oxford University Press journal article supplement (doi:10.1093/femsec/fix102), 2017-08-11

otu80.chronoseq

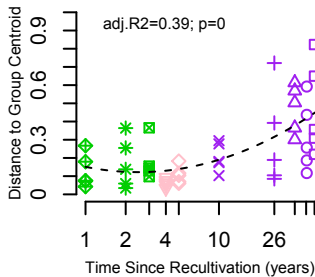

otu85.chronoseq

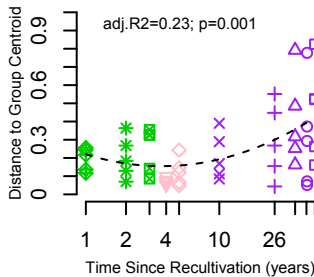

otu90.chronoseq

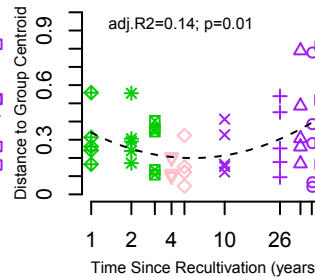

otu91.chronoseq

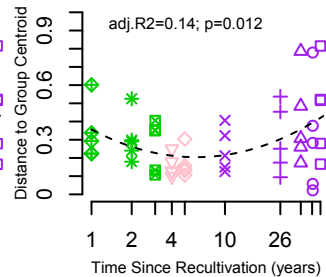

otu92.chronoseq

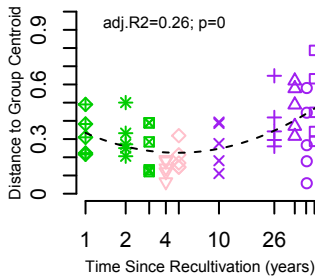

otu93.chronoseq

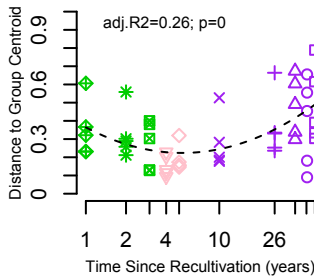

otu94.chronoseq

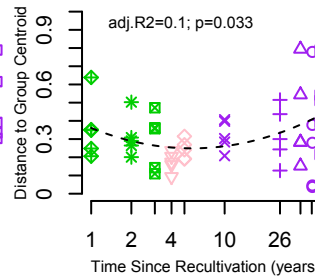

otu95.chronoseq

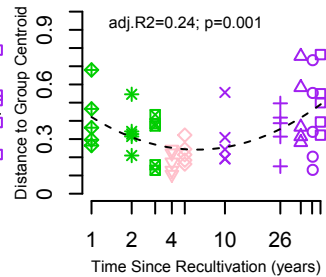

otu96.chronoseq

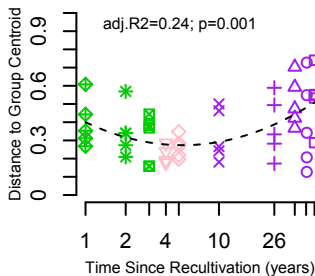

otu97.chronoseq

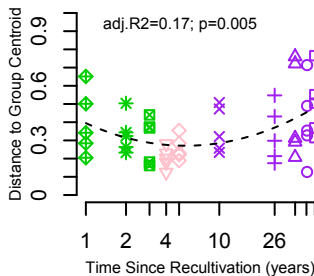

otu98.chronoseq

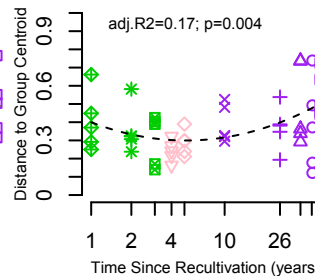

otu99.chronoseq

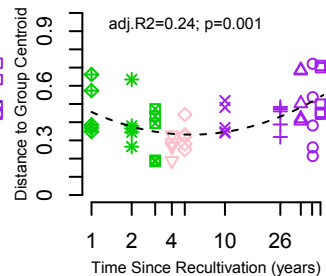

otu100.chronoseq

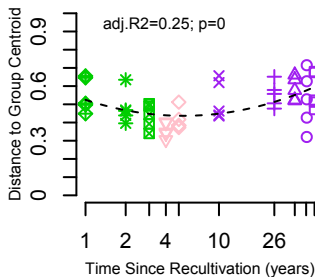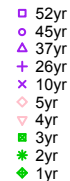

Supplement: fix102_Supp.zip [file fix102_Supp.zip]
