# Supplementary figures and images for: Succession of arbuscular mycorrhizal fungi along a 52-years agricultural recultivation chronosequence
Source: Oxford University Press journal article supplement (doi:10.1093/femsec/fix102), 2017-08-11

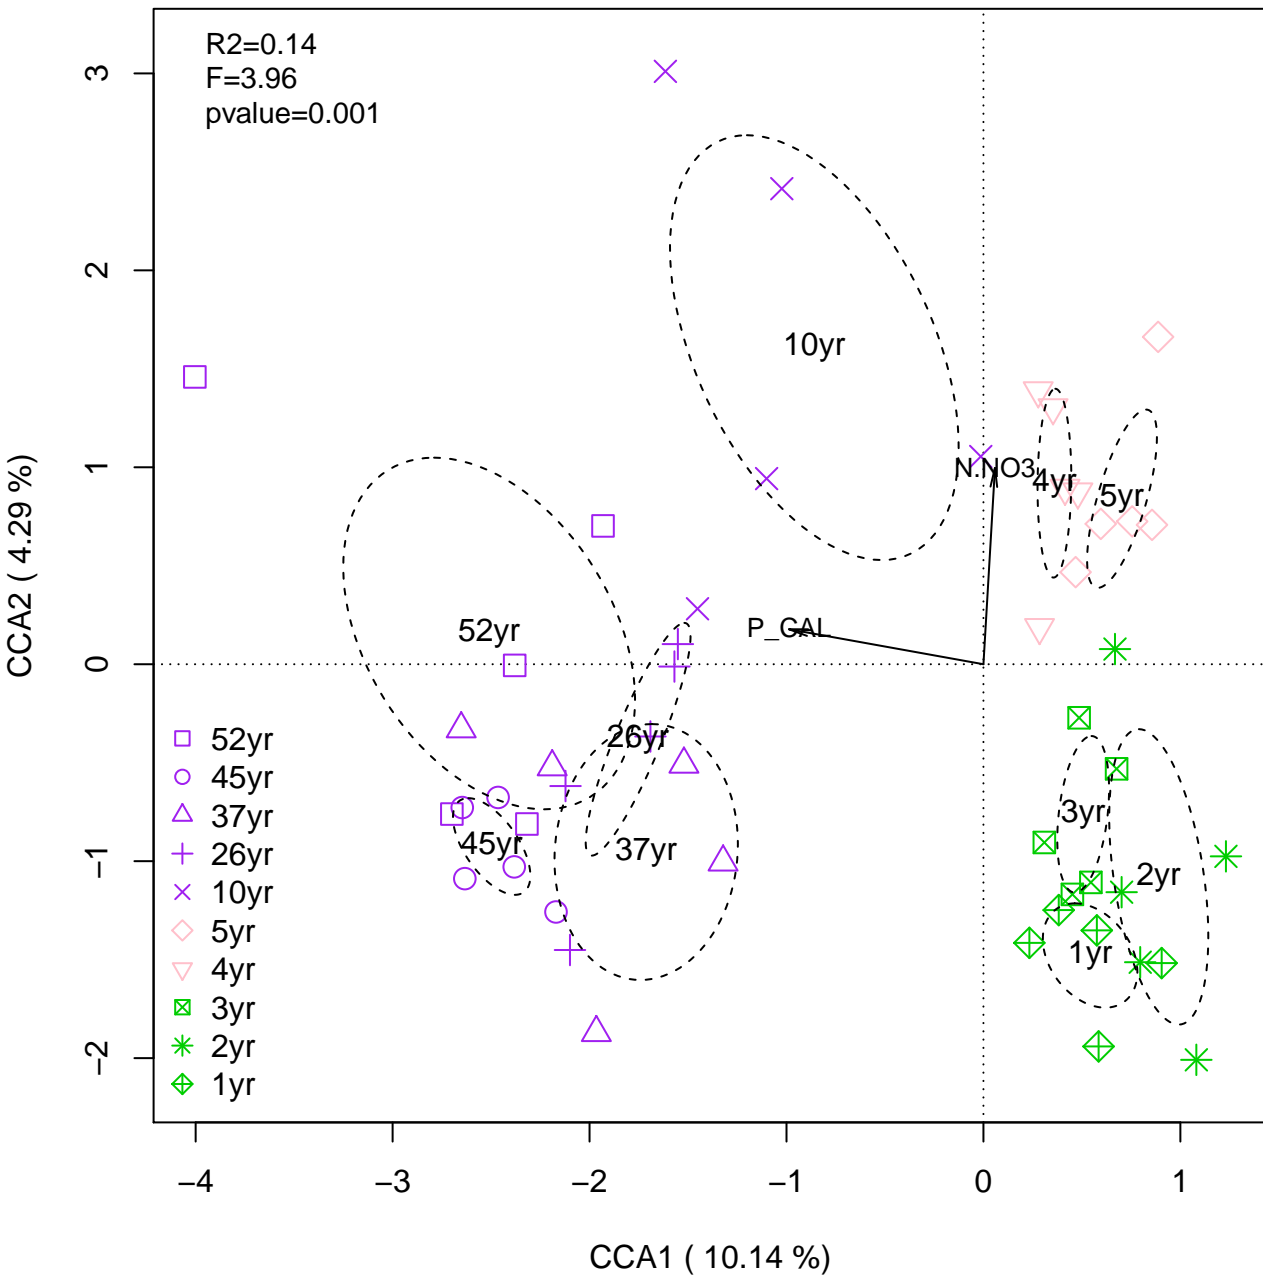

Supplement: fix102_Supp.zip [file fix102_Supp.zip]

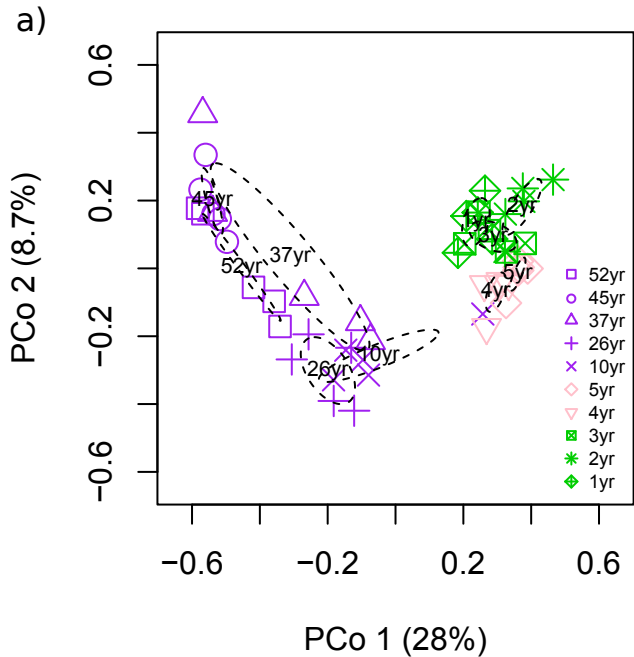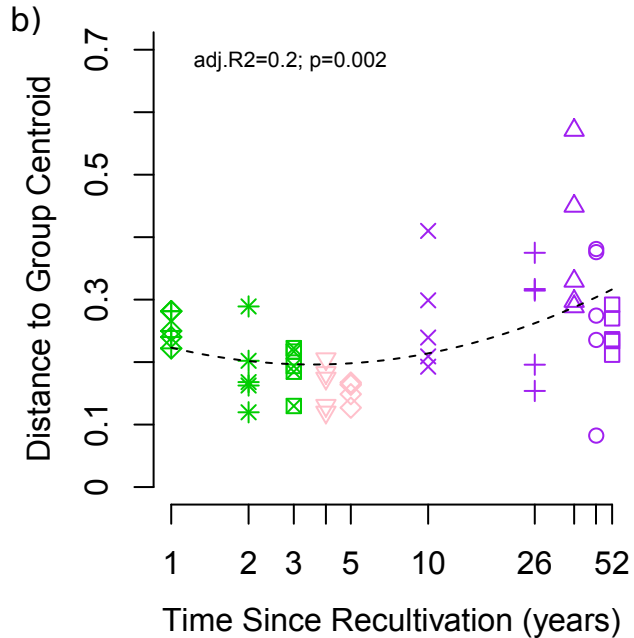

Supplement: fix102_Supp.zip [file fix102_Supp.zip]

a)

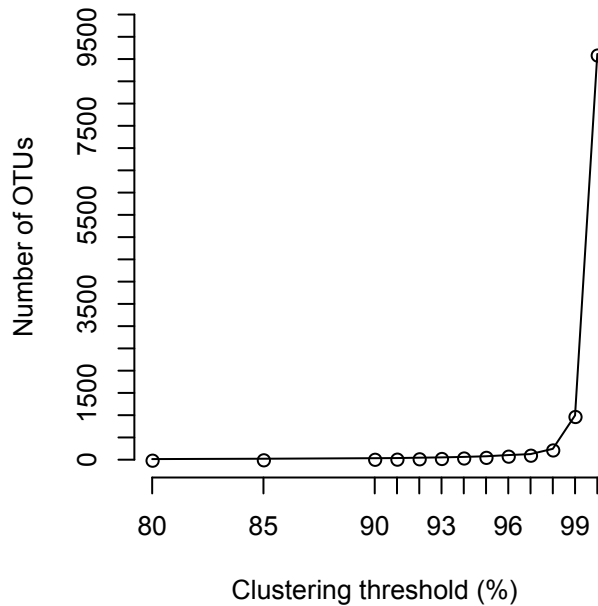

b)

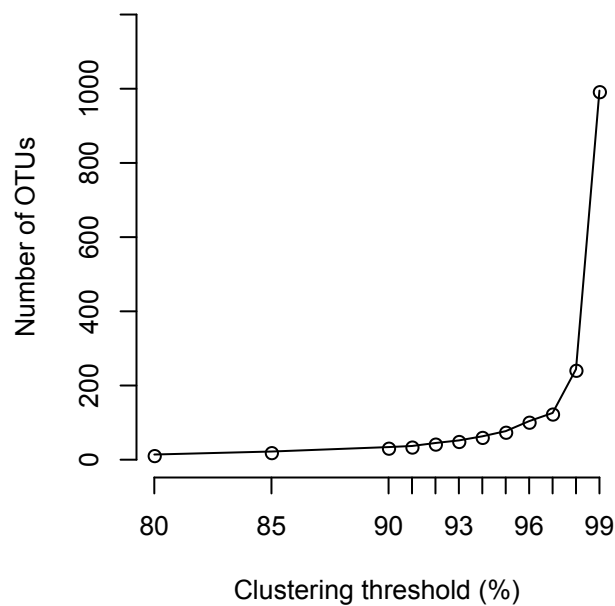

Supplement: fix102_Supp.zip [file fix102_Supp.zip]

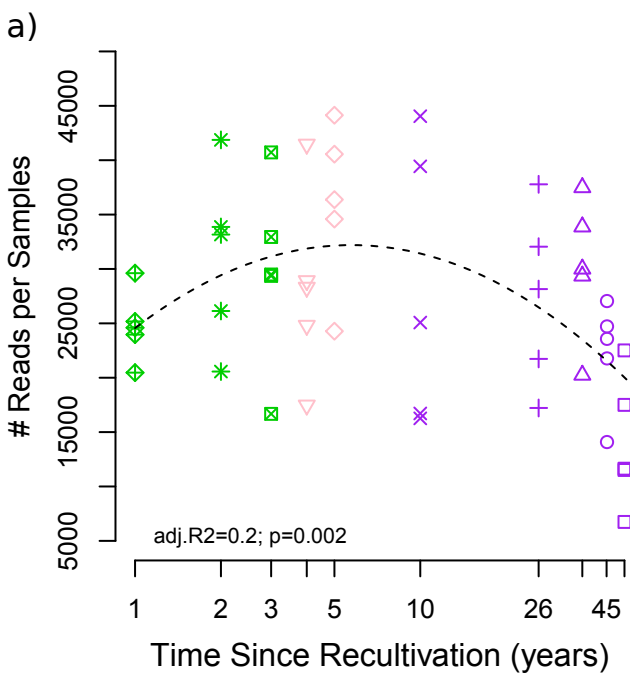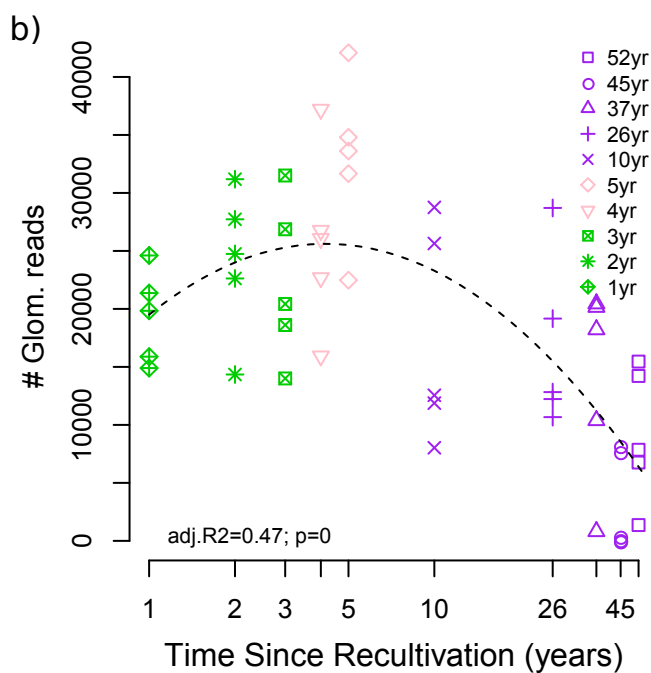

Supplement: fix102_Supp.zip [file fix102_Supp.zip]

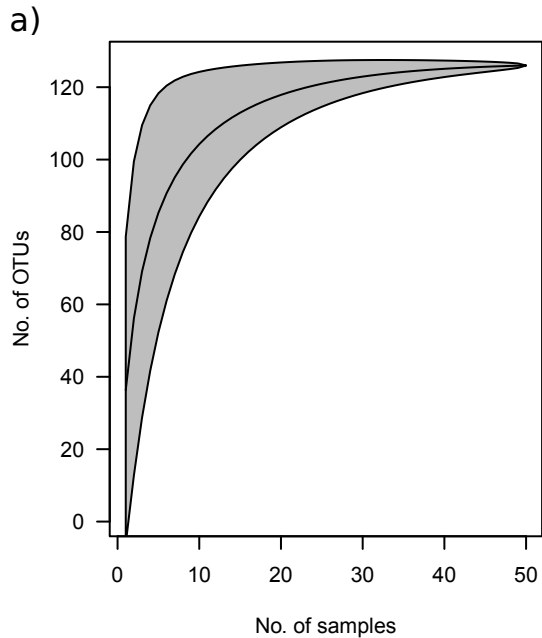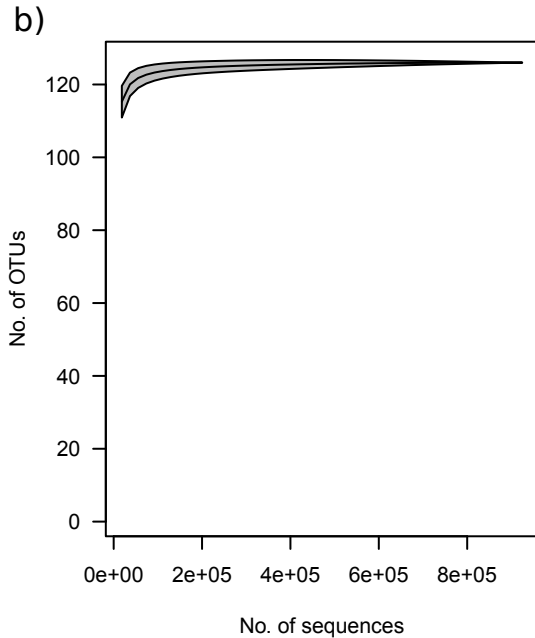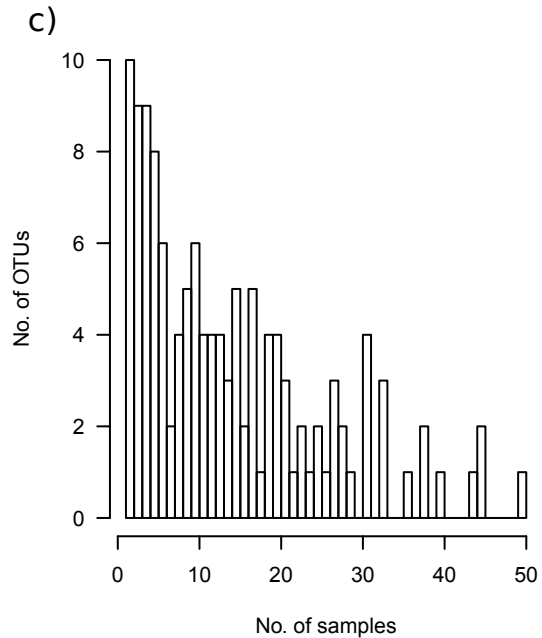

Supplement: fix102_Supp.zip [file fix102_Supp.zip]

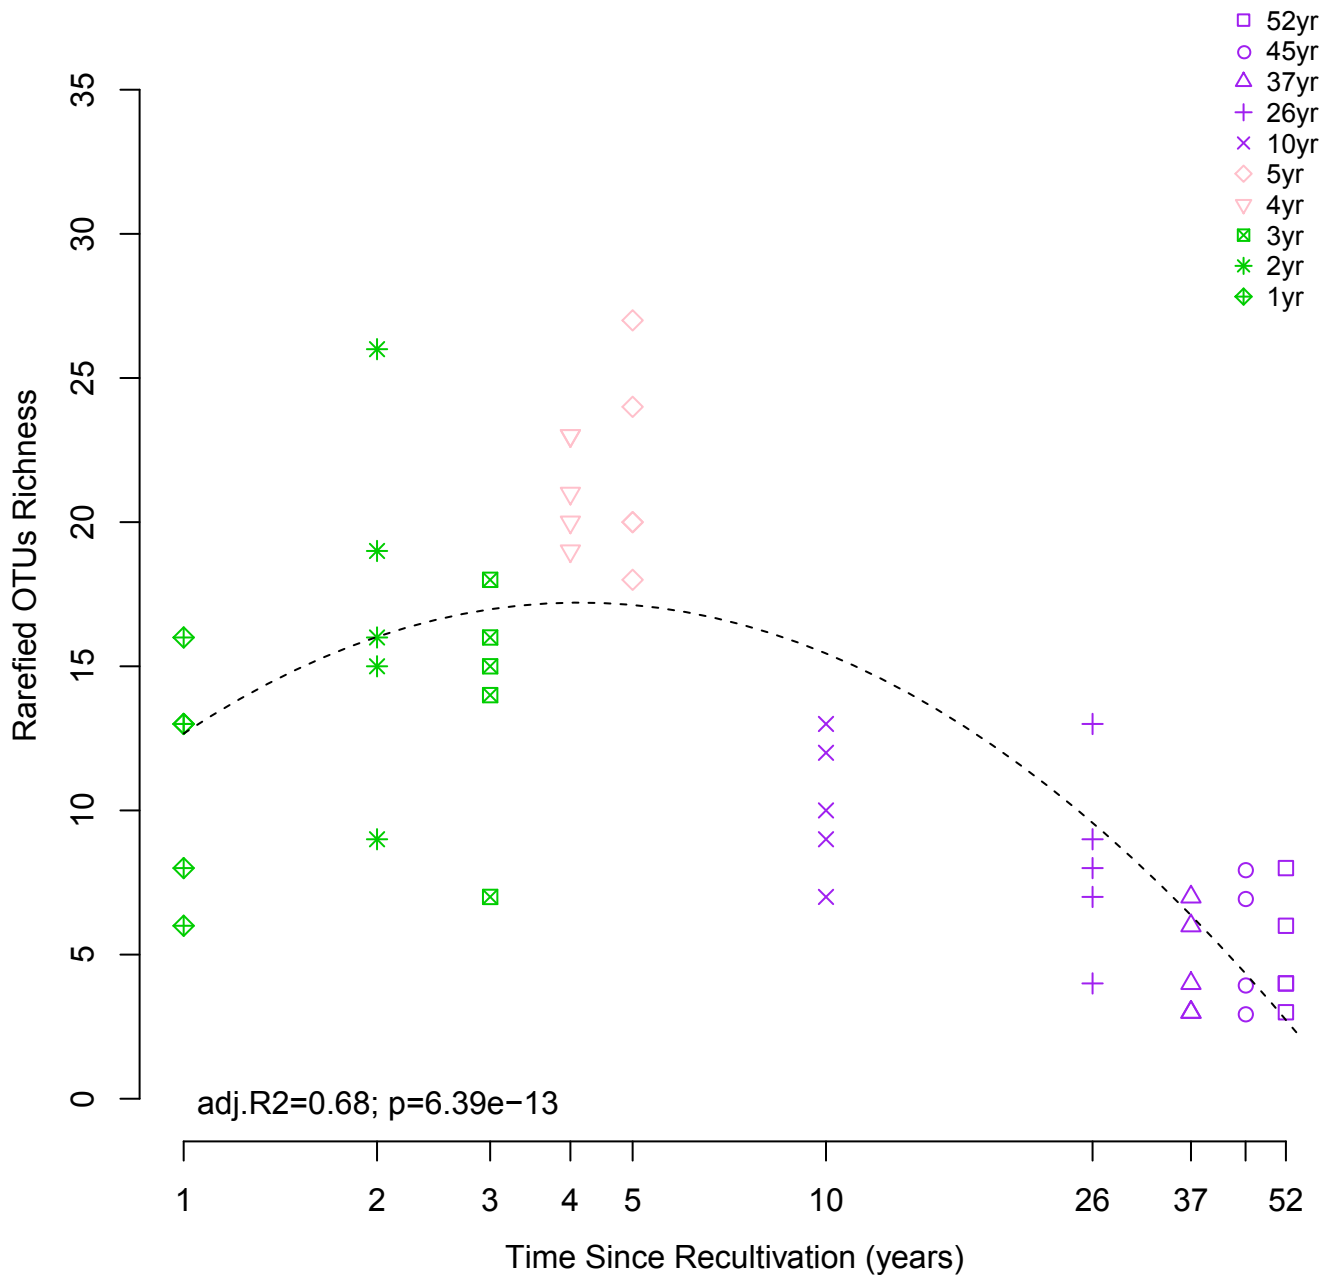

Supplement: fix102_Supp.zip [file fix102_Supp.zip]

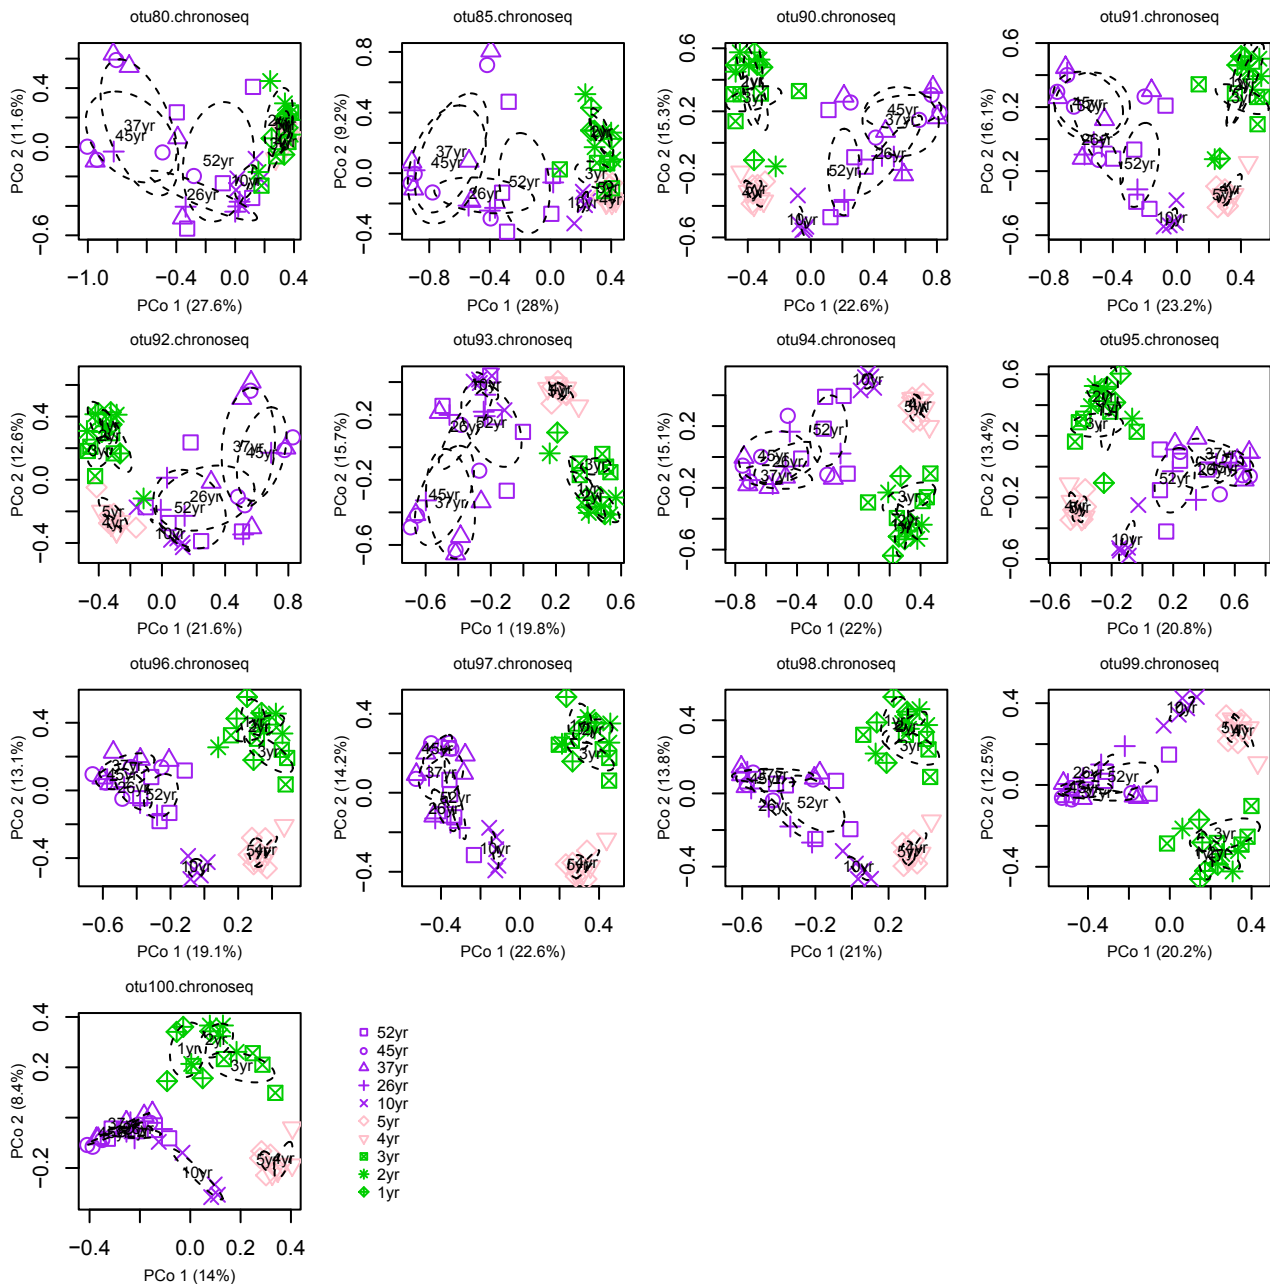

Supplement: fix102_Supp.zip [file fix102_Supp.zip]

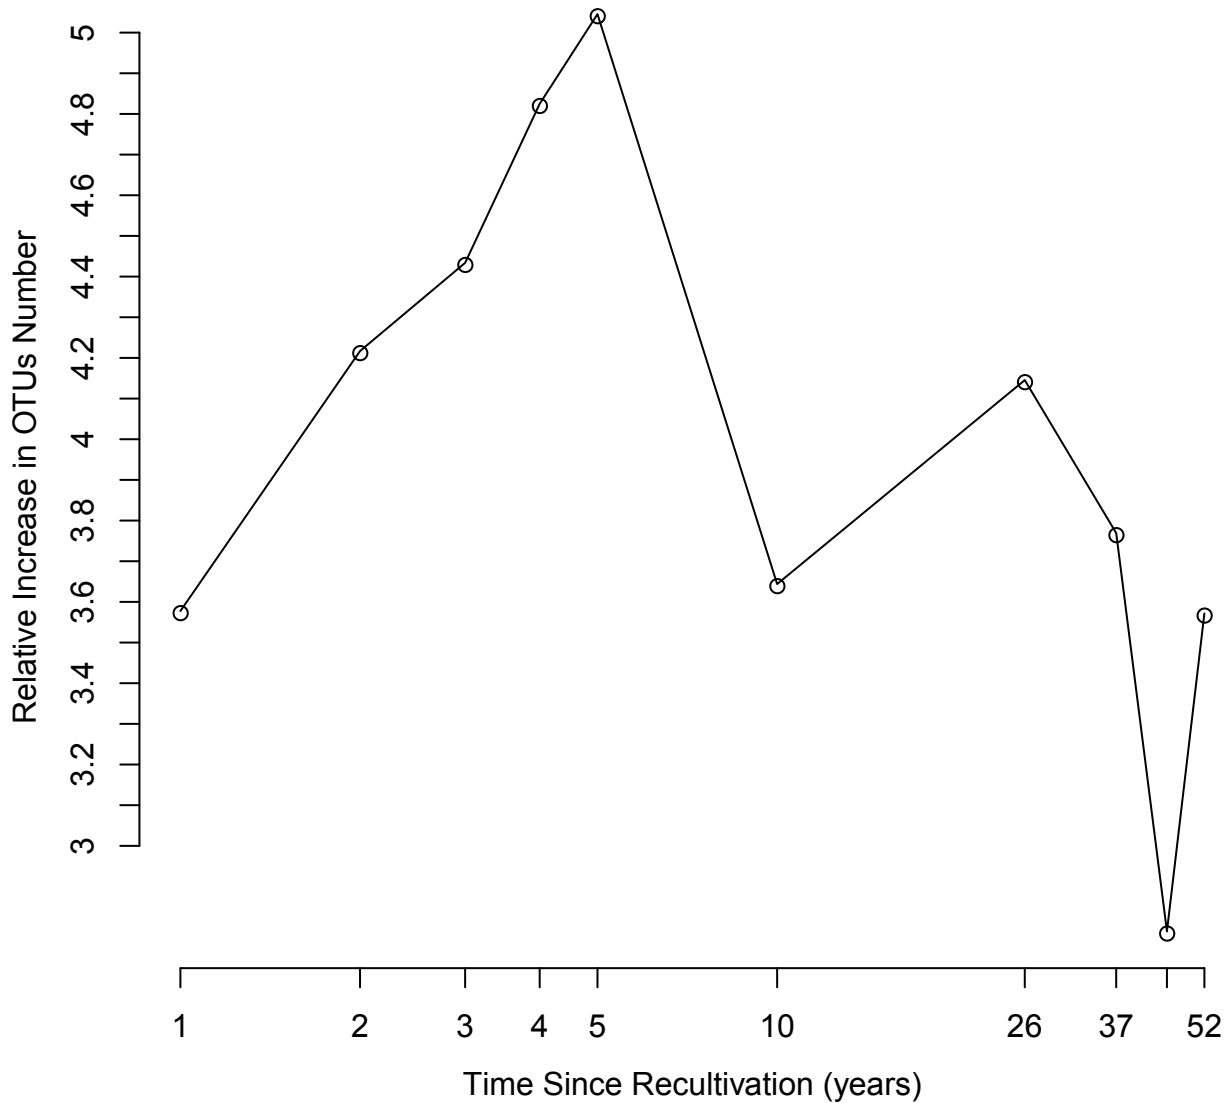

Supplement: fix102_Supp.zip [file fix102_Supp.zip]

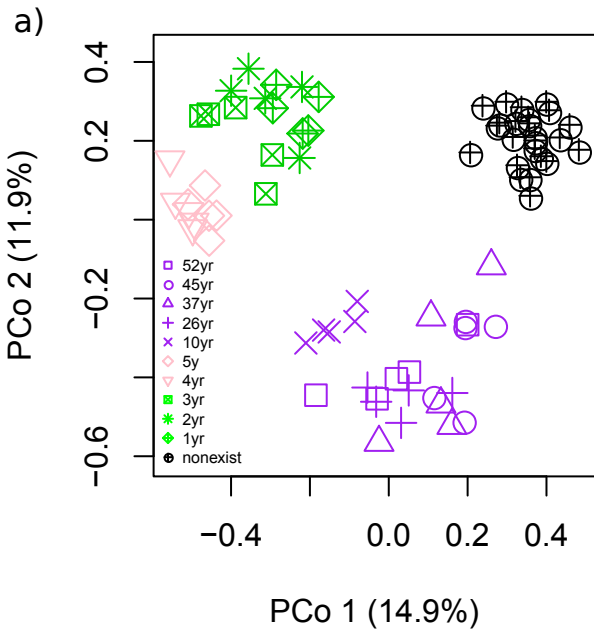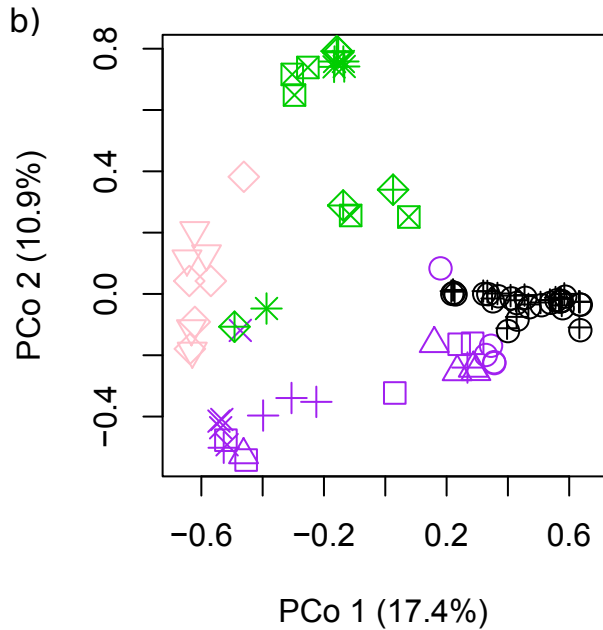

Supplement: fix102_Supp.zip [file fix102_Supp.zip]

PC2 18.4 %

2

0

-2

-4

-6

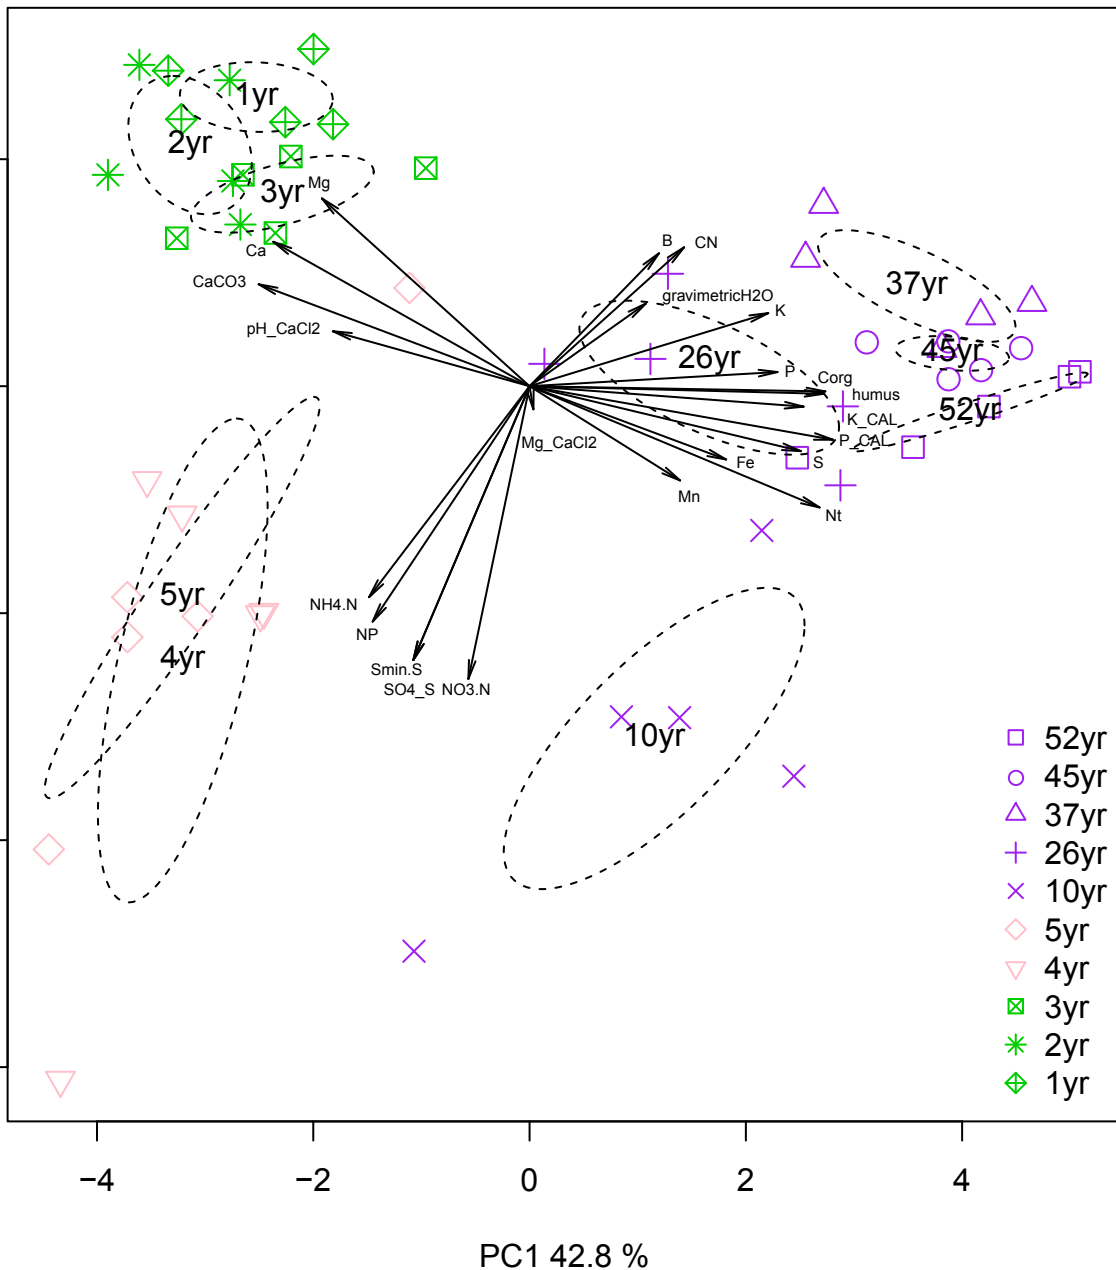

PC1 42.8 %

Supplement: fix102_Supp.zip [file fix102_Supp.zip]
